# Supplementary material for: Effect of NaCl on Morphophysiological and Biochemical Responses in Gossypium hirsutum L.
Source: MDPI journal article supplement (doi:10.3390/agronomy13041012), 2023-03-30
Supplement: s1 [file s1]

## Supplementary Materials

**Title: “Effect of NaCl on Morpho-Physiological and Biochemical Responses in *Gossypium hirsutum* L.”**

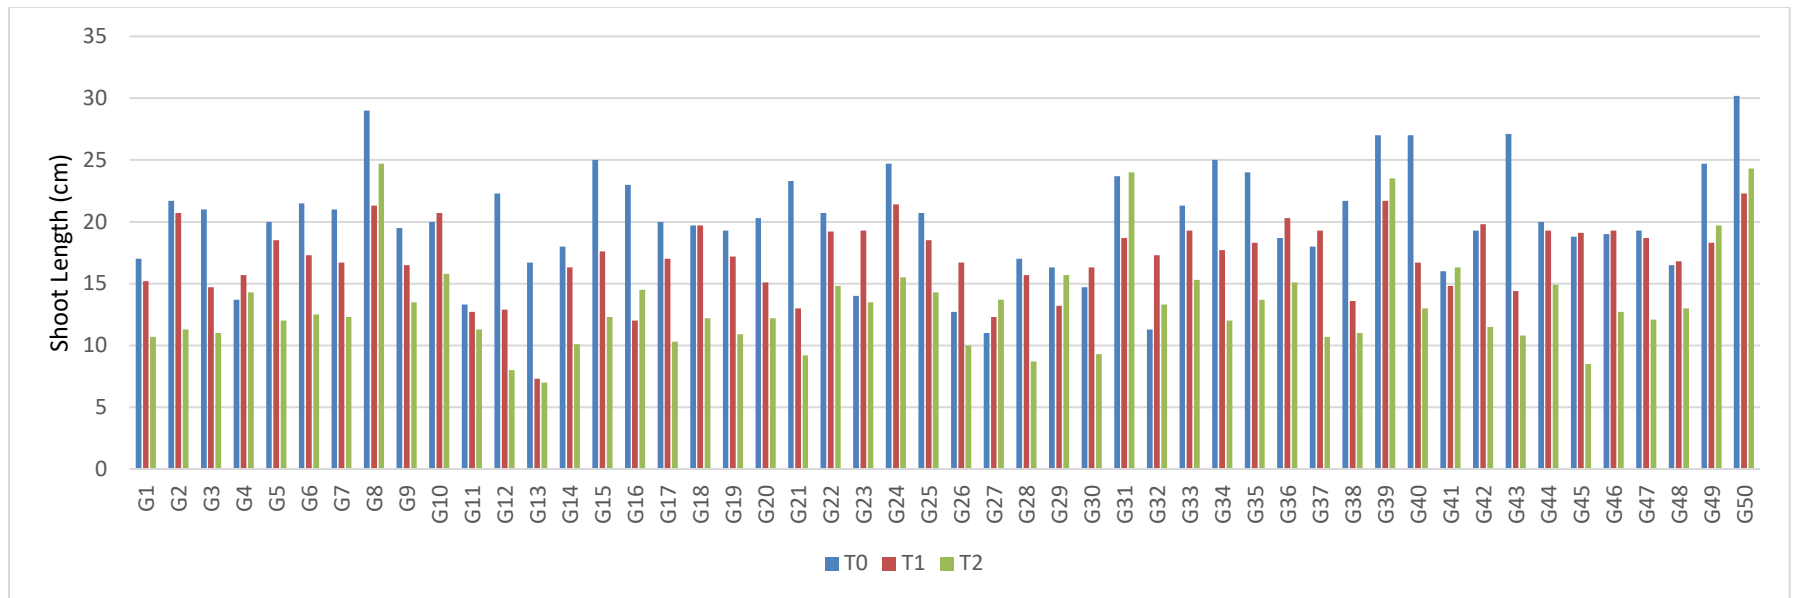

**Supplementary Figure S1:** Comparison of different treatments on the shoot length of 50 cotton genotypes. Where T0=control, T1= 150 mM, T2= 200 mM NaCl.

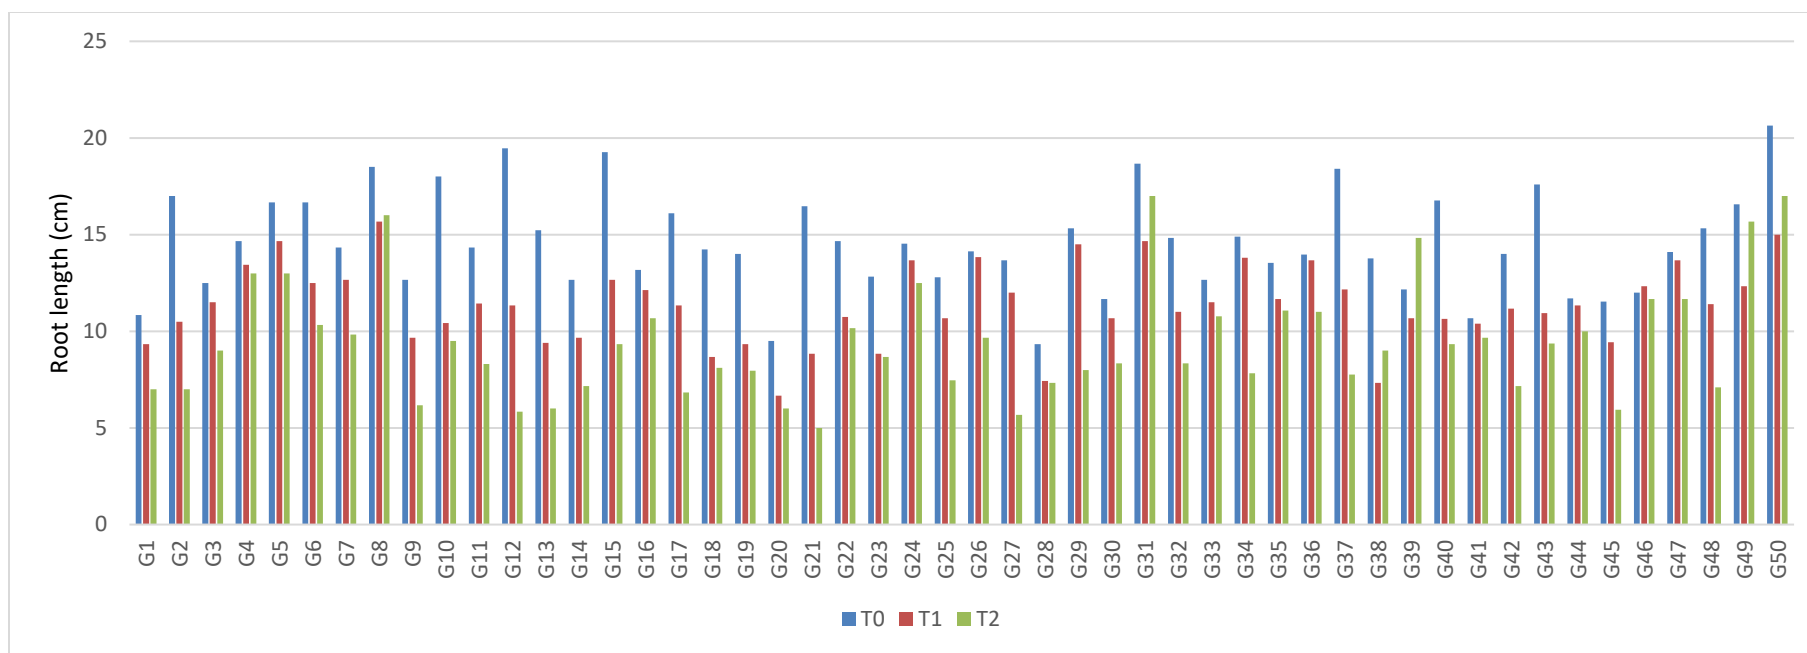

**Supplementary Figure S2:** Comparison of different treatments on the root length of 50 cotton genotypes. Where T0=control, T1= 150 mM, T2= 200 mM NaCl.

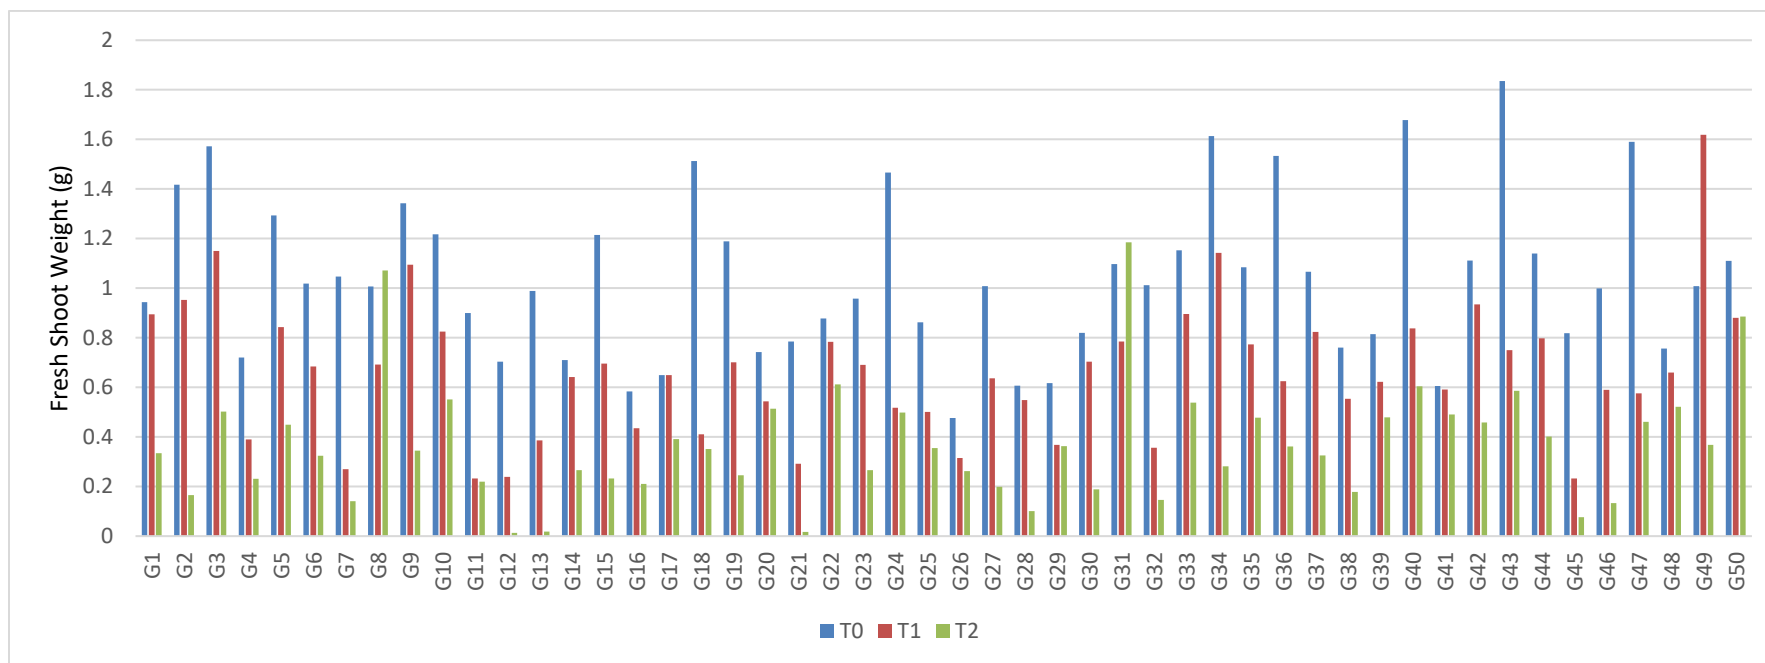

**Supplementary Figure S3:** Comparison of different treatments on the fresh shoot weight of 50 cotton genotypes. Where T0=control, T1= 150 mM, T2= 200 mM NaCl.

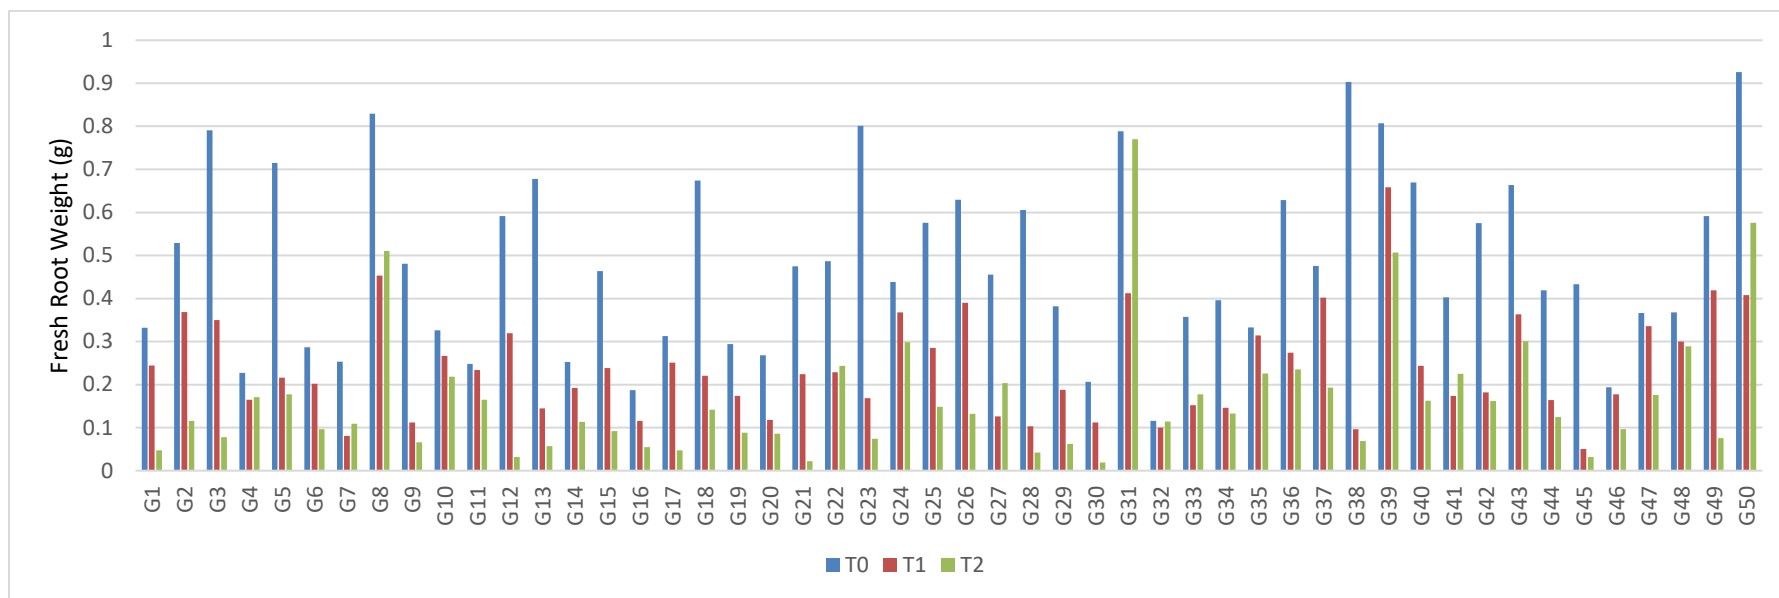

**Supplementary Figure S4:** Comparison of different treatments on the fresh root weight of 50 cotton genotypes. Where T0=control, T1= 150 mM, T2= 200 mM NaCl.

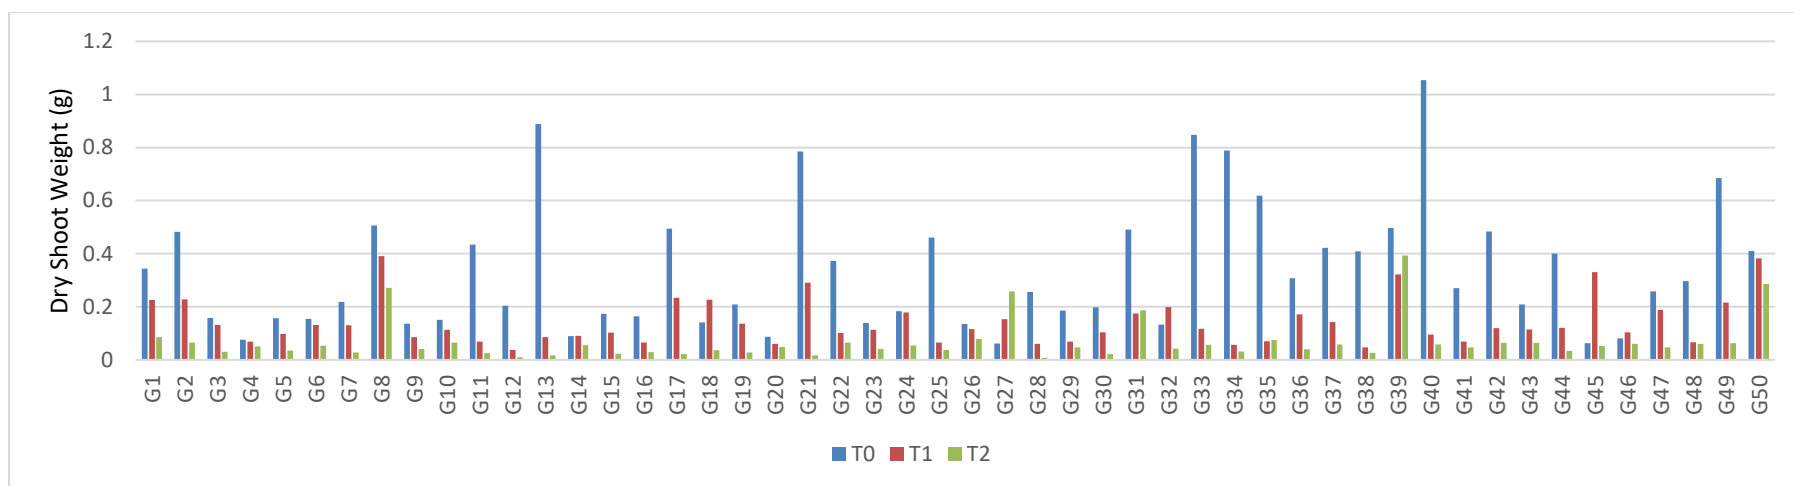

**Supplementary Figure S5:** Comparison of different treatments on the dry shoot weight of 50 cotton genotypes. Where T0=control, T1= 150 mM, T2= 200 mM NaCl.

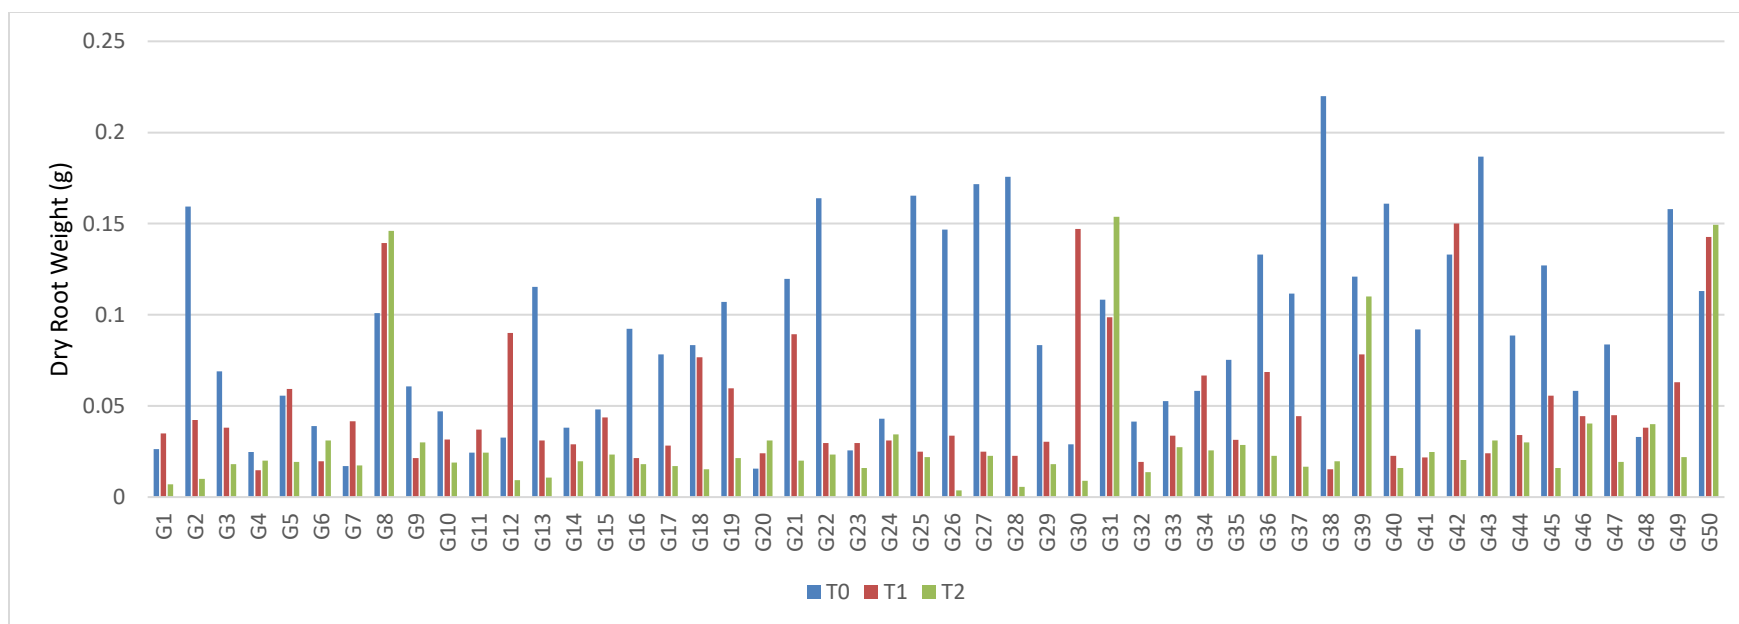

**Supplementary Figure S6:** Comparison of different treatments on the dry root weight of 50 cotton genotypes. Where T0=control, T1= 150 mM, T2= 200 mM NaCl.

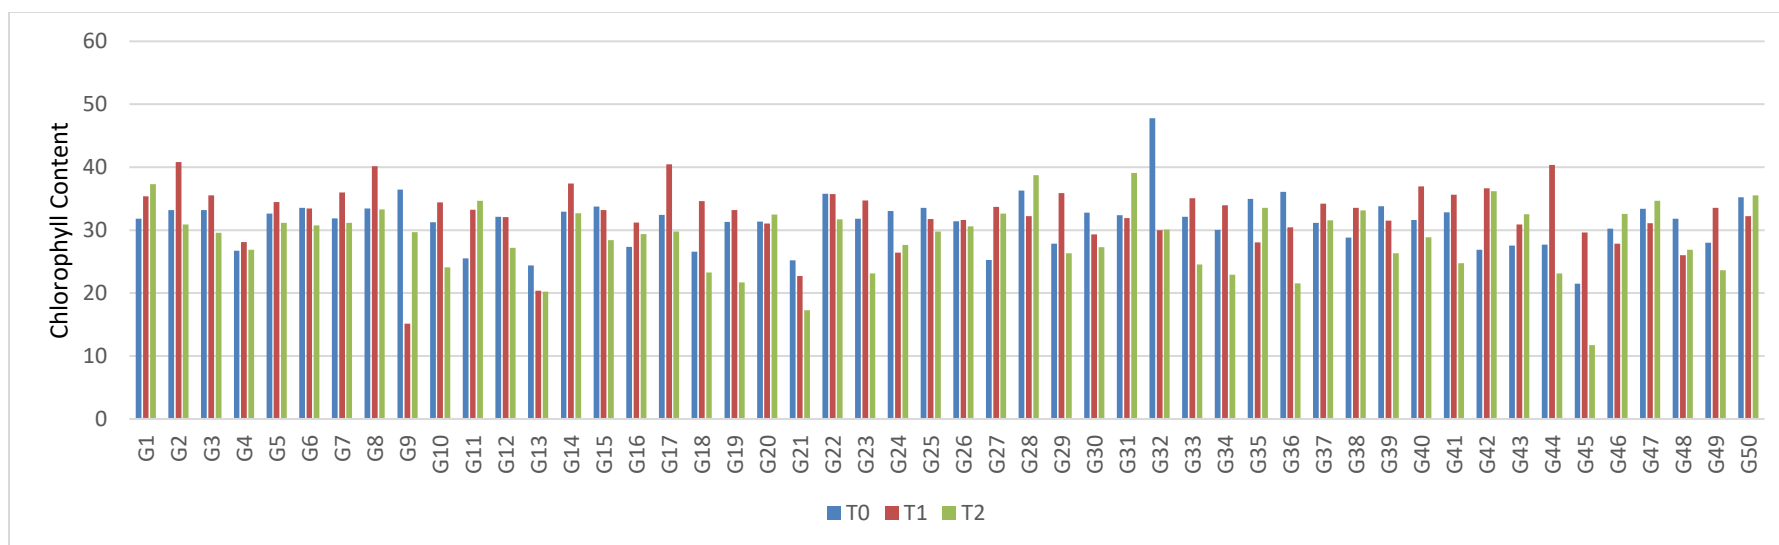

**Supplementary Figure S7:** Comparison of different treatments on the chlorophyll content of 50 cotton genotypes. Where T0=control, T1= 150 mM, T2= 200 mM NaCl.

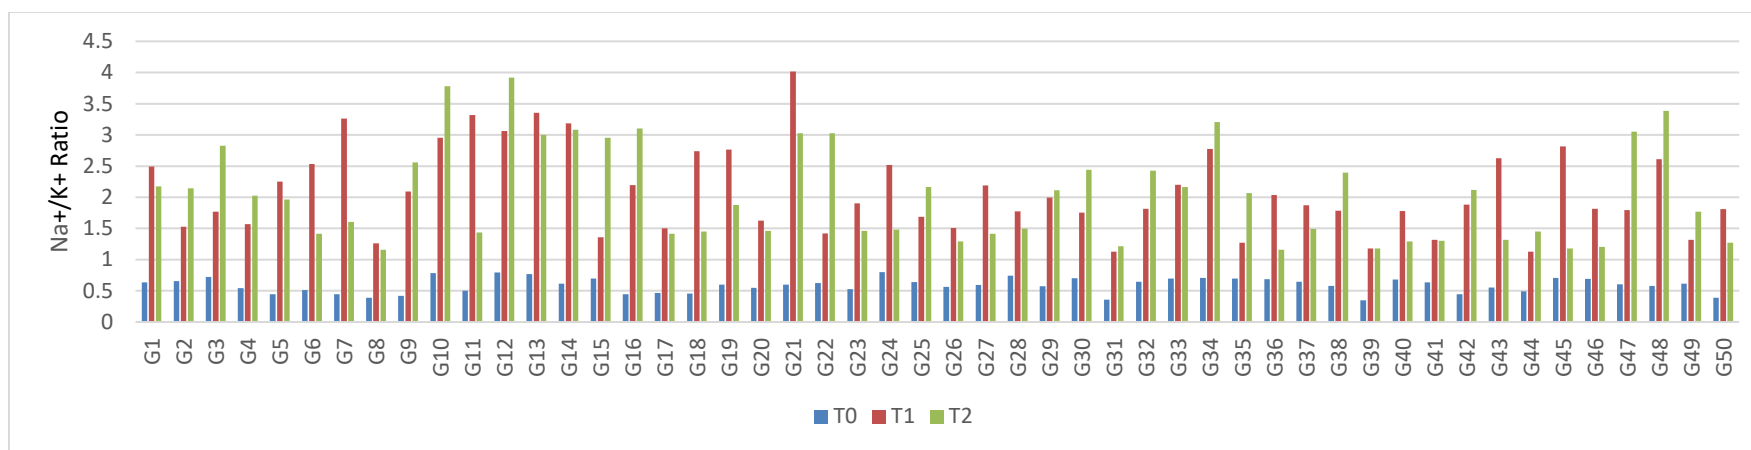

**Supplementary Figure S8:** Comparison of different treatments on the Na<sup>+</sup>/K<sup>+</sup> ratio of 50 cotton genotypes. Where T0=control, T1= 150 mM, T2= 200 mM NaCl.



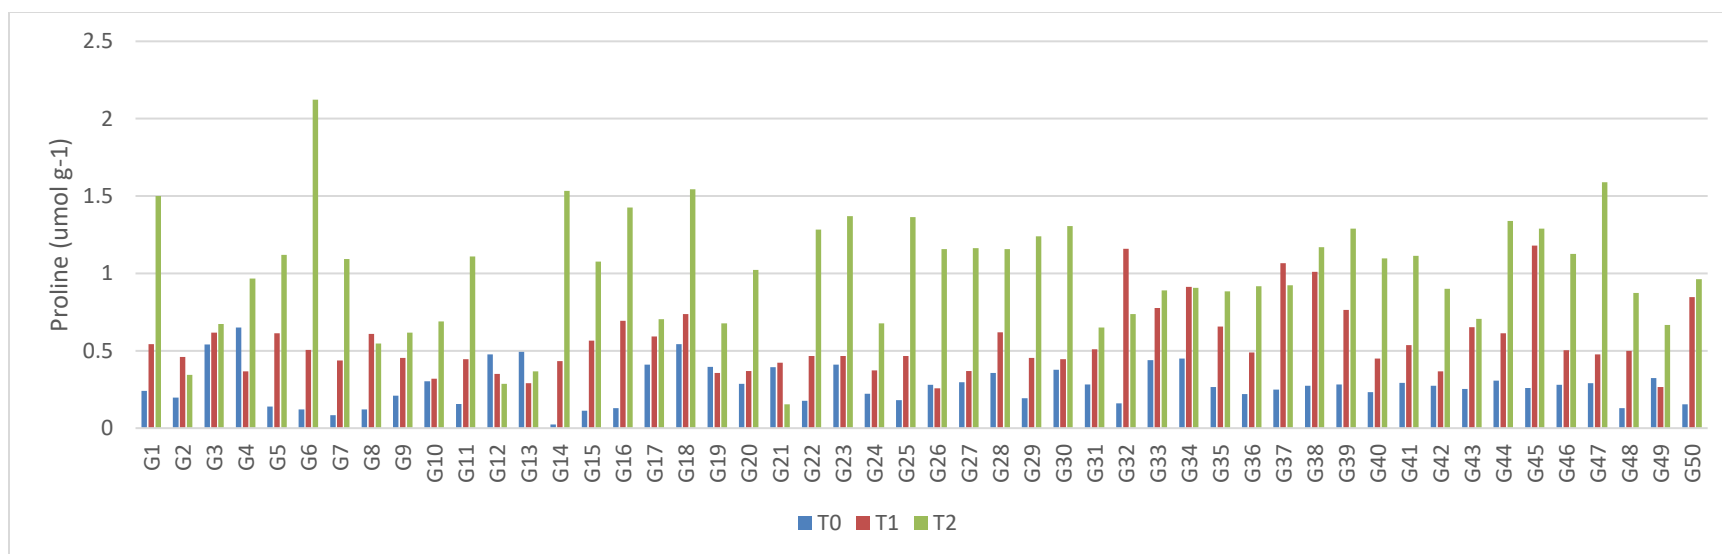

**Supplementary Figure S9:** Comparison of different treatments on the proline content of 50 cotton genotypes. Where T0=control, T1= 150 mM, T2= 200 mM NaCl.

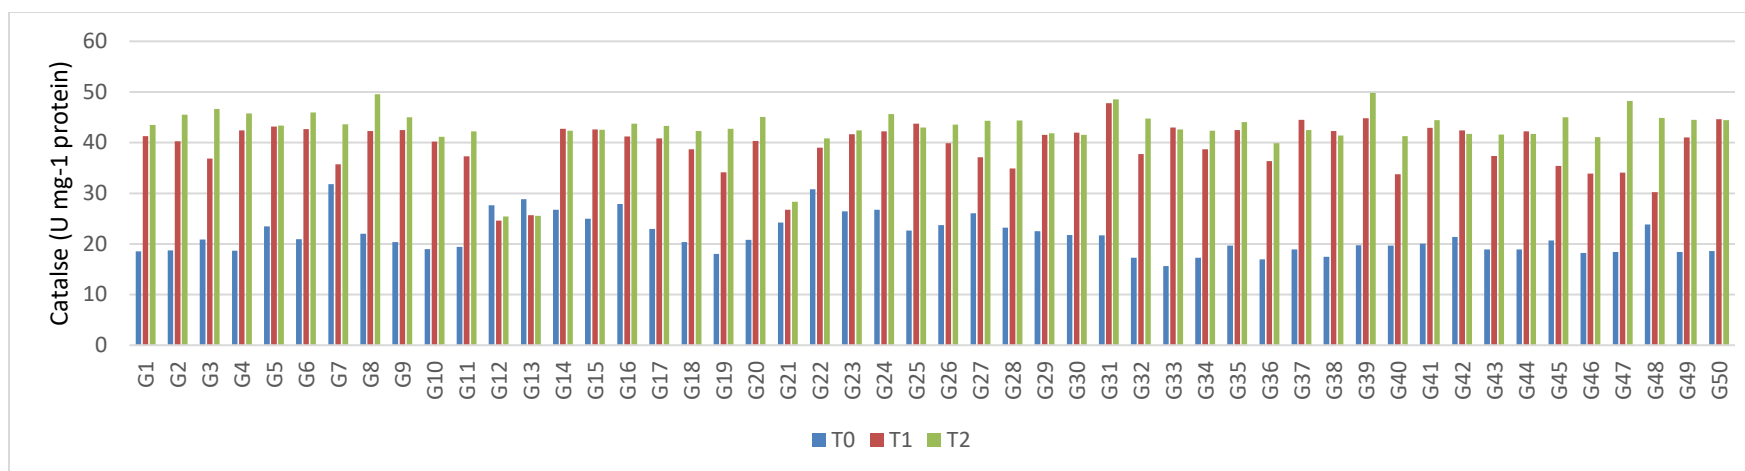

**Supplementary Figure S10:** Comparison of different treatments on the catalase activity of 50 cotton genotypes. Where T0=control, T1= 150 mM, T2= 200 mM NaCl.

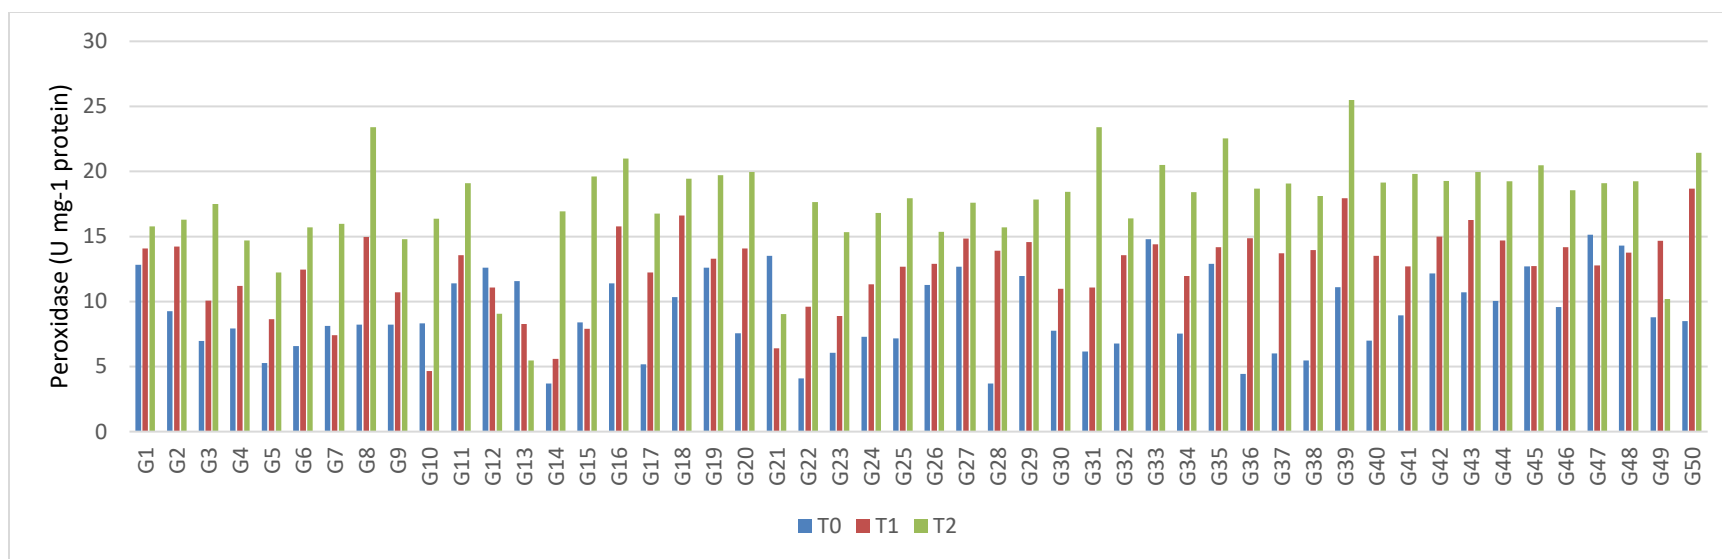

**Supplementary Figure S11:** Comparison of different treatments on the peroxidase activity of 50 cotton genotypes. Where T0=control, T1= 150 mM, T2= 200 mM NaCl.

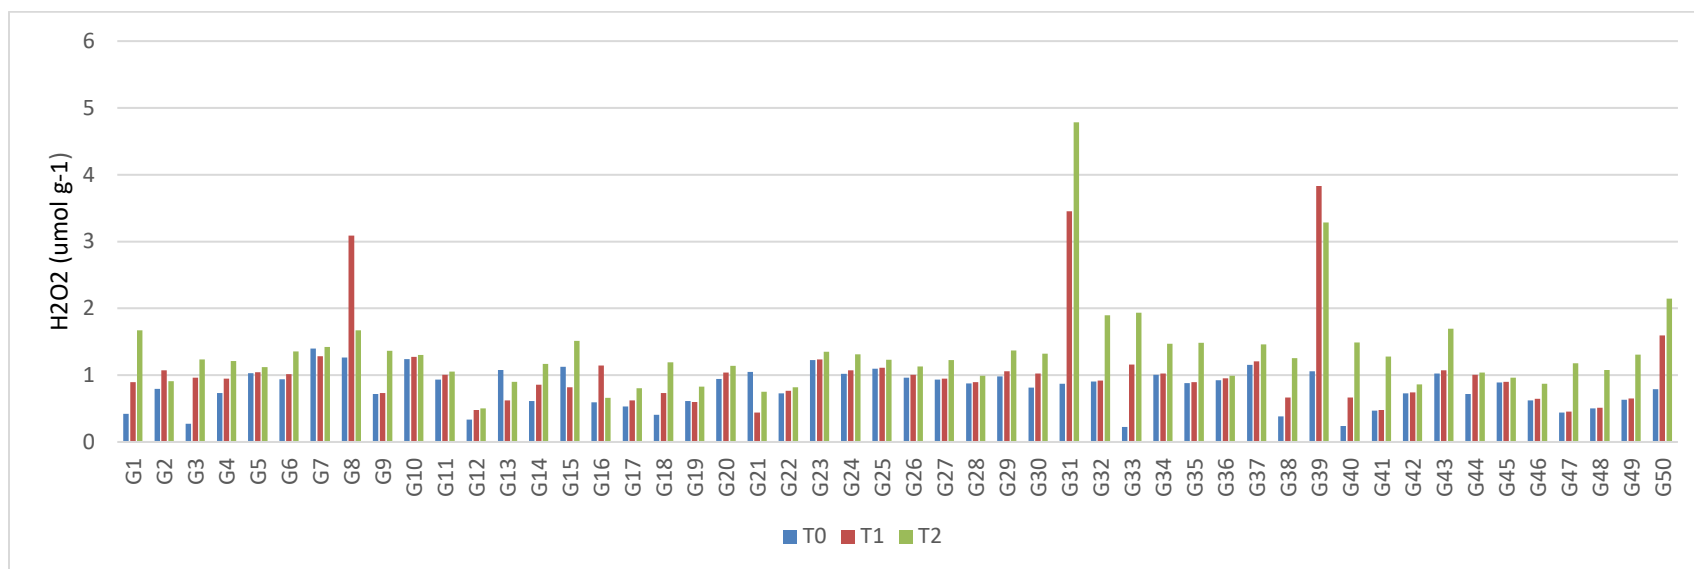

**Supplementary Figure S12:** Comparison of different treatments on the hydrogen peroxidase of 50 cotton genotypes. Where T0=control, T1= 150 mM, T2= 200 mM NaCl.
